# Supplementary material for: lncRNA IGFL2-AS1 mediates NSCLC chemoresistance via YBX1-induced HSPA1A/RAP1 activation
Source: Springer Nature journal article supplement (doi:10.1186/s11658-025-00808-5), 2025-11-07
Supplement: MOESM1 [file 11658_2025_808_MOESM1_ESM.docx]

**Additional File 1 (Tables) Supporting information for**

**LncRNA IGFL2-AS1 mediates NSCLC chemoresistance via YBX1-induced HSPA1A/RAP1 activation**

Hongliang Dong1,2,3†, Yunxiu Xia2,4†, Jingjing Qi5†, Cuilan Liu1,2,3, Fei Wang1,2,3, Bingjie Cui1,2,3, Weiwei Chen1,2,3, Wenwen Lv6, Nailiang Zhai1, Jiong Deng1,2, Yong Yu5, Fangling Ning3, Clemens A. Schmitt5,7,8,9*, Jing Du1,2,3*

1Department of Respiratory and Critical Care Medicine, Binzhou Medical University Hospital, 256600 Binzhou, P.R. China

2Medical Research Center, Binzhou Medical University Hospital, 256600 Binzhou, P.R. China

3Department of Oncology, Binzhou Medical University Hospital, 256600 Binzhou, P.R. China

4Department of Gynecology, Binzhou Medical University Hospital, 256600 Binzhou, P.R. China

5Faculty of Medicine, Johannes Kepler University Linz, Altenberger Strasse 69, 4040 Linz, Austria

6Department of Pharmacy, Binzhou Medical University Hospital, 256600 Binzhou, P.R. China

7Johannes Kepler University, Altenbergerstraße 69, 4040 Linz, Austria

8Charité - Universitätsmedizin Berlin, corporate member of Freie Universität Berlin, Humboldt-Universität zu Berlin, and Berlin Institute of Health, Medical Department of Hematology, Oncology and Tumor Immunology, and Molekulares Krebsforschungszentrum - MKFZ, Campus Virchow Klinikum, 13353 Berlin, Germany

9Max-Delbrück-Center for Molecular Medicine in the Helmholtz Association, Robert-Rössle-Straße 1013125 Berlin, Germany

†Hongliang Dong, Yunxiu Xia, and Jingjing Qi contributed equally to this work.

***Correspondence**

Jing Du, Binzhou Medical University Hospital, 661 Huanghe Second Road, Binzhou, P.R. China

Email: djedith@bzmc.edu.cn

Clemens A. Schmitt, Department of Hematology and Internal Oncology, Kepler University Hospital, Krankenhausstraße 9, 4020 Linz, Austria

Email: [clemens.schmitt@charite.de](mailto:clemens.schmitt@charite.de)

**Table 1**. Primers used for quantitative real-time PCR and RNA pull-down assays

| **Name** | **Primer 5′-3′** |
| --- | --- |
| *IGFL2-AS1-F1* | ACAAAGCCTGTTGGTGGA |
| *IGFL2-AS1-R1* | TGGGTGGATCTCATGGAG |
| *C/EBPβ-F* | CTGGAGACGCAGCACAAGGT |
| *C/EBPβ-R* | TGAACAAGTTCCGCAGGGTG |
| *USF-2-F* | CCATCCGTCTGTCTGTCGC |
| *USF-2-R* | CCTCCTTCCCATCAGCACC |
| *HSPA1A-F* | CTGCGACAGTCCACTACCTT |
| *HSPA1A-R* | CGGCTCCGCTCTGAGATT |
| *YBX1-F* | ACTGCCATAAAGAAGAATAACC |
| *YBX1-R* | CTGCCTTGAACTGGAACAC |
| *IGFL2-AS1 sense-F* | TAATACGACTCACTATAGGGAGCCCAGTTGCACCCA |
| *IGFL2-AS1 sense-R* | TCGGGGCATAATAGAAGGCT |
| *IGFL2-AS1an-tisense-F* | TAATACGACTCACTATAGGGTCGGGGCATAATAGAA |
| *IGFL2-AS1an-tisense-R* | AGCCCAGTTGCACCCAAGTA |
| *HNRNPA1-F* | TGACTCCGTGGATAAGAT |
| *HNRNPA1-R* | AGAACCACTTCGACCTCT |
| *RAP1-F* | CCTTCTTAGCGTCTGGTC |
| *RAP1-R* | CAATCCTCCGAGCTACATT |
| *SRC-F* | CGGCTTGTGGGTGATGTT |
| *SRC-R* | CCTGGACTCTTGGCTCTTCTA |
| *AFDN-F* | CGGGCACTCATCTTTACT |
| *AFDN-R* | AACTGTCTTACTACGCTCCTA |
| *VAV3-F* | CCATCCTGGGAGTGTATT |
| *VAV3-R* | GAAAGGGCCAAGTTAGTG |
| *MAP2K6-F* | ACTTGGTGGACTCTGTTG |
| *MAP2K6-R* | TGAATCATAGGGAAATCG |
| *PIK3R1-F* | GTATGTTGGTTACCCTCCTA |
| *PIK3R1-R* | ATGACCATGACTTTAGCG |
| *PLCE1-F* | GGAGAATCCTCGGTAGAA |
| *PLCE1-R* | TTGGTTGTCAGCGTATGT |
| *Snail-F* | TCCACGAGGTGTGACTAACT |
| *Snail-R* | CCGACAAGTGACAGCCATTA |
| *Twist-F* | CTAGAGACTCTGGAGCTGGATA |
| *Twist-R* | TCTGGGAATCACTGTCCACG |
| *Vimentin-F* | CGCCAACTACATCGACAAGGTGC |
| *Vimentin-R* | CTGGTCCACCTGCCGGCGCAG |
| *E-cadherin-F* | ACGCATTGCCACATACAC |
| *E-cadherin-R* | ACCTTCCATGACAGACCC |
| *ABCG2-F* | ACGAACGGATTAACAGGGTCA |
| *ABCG2-R* | CTCCAGACACACCACGGAT |
| *OCT4-F* | AGCGACTATGCACAACGA |
| *OCT4-R* | CCAGAGTGGTGACGGAGA |
| *Nango-F* | CTCCTCCCATCCCTCATA |
| *Nango-R* | AGGCTCCAACCATACTCC |
| *GAPDH-F* | CTCCTCCTGTTCGACAGTCAGC |
| *GAPDH-R* | CCCAATACGACCAAATCCGTT |
| *U6-F* | CTCGCTTCGGCAGCACA |
| *U6-R* | AACGCTTCACGAATTTGCGT |

**Table 2.** Antibodies for immunoblot and immunohistochemistry

| **Antibody Name** | **Catalog Number** | **Company** | **Source** | **Observed MW** | **Recommended Dilutions** |
| --- | --- | --- | --- | --- | --- |
| C/EBPβ | BM3970 | BOSTER BIOLOGICAL TECHNOLOGY，Wuhan, China. | Rabbit | 42KD | WB: 1:500 |
| HSPA1A | AF5466 | Affinity Biosciences, Jiangsu, China. | Rabbit | 70KD | WB: 1:500  IHC: 1:50. |
| YBX1 | 20339-1-AP | Proteintech Group, Inc., Wuhan, China. | Rabbit | 50KD | WB: 1:2000  IHC: 1:50 |
| RAP1 | R389081 | ZEN-BIOSCIENCE,  Chengdu, China. | Rabbit | 20KD | WB: 1:1000 |
| Ki67 | A00254 | BOSTER BIOLOGICAL TECHNOLOGY, Wuhan, China | Rabbit | 358KD | IHC: 1:50 |
| Vimentin | PB9359 | BOSTER BIOLOGICAL TECHNOLOGY, Wuhan, China | Rabbit | 56KD | IHC: 1:50 |
| SOX2 | BM4147 | BOSTER BIOLOGICAL TECHNOLOGY, Wuhan, China | Rabbit | 36KD | IHC: 1:50 |
| HNRNPA1 | A01476 | BOSTER BIOLOGICAL TECHNOLOGY, Wuhan, China | Rabbit | 39KD | WB: 1:500 |
| α-Tubulin | BM1452 | BOSTER BIOLOGICAL TECHNOLOGY, Wuhan, China. | Mouse | 55KD | WB: 1:2000 |
| Mouse anti DDDDK-Tag mAb | AE005 | ABclonal, Wuhan, China. | Mouse | 35 KD | WB: 1:1000 |
| HRP Conjugate AffiniPure Goat Anti-rabbit IgG (H+L) | BA1054 | BOSTER BIOLOGICAL TECHNOLOGY, Wuhan, China. | Goat | / | WB: 1:10000 |
| HRP Conjugate AffiniPure Goat Anti-mouse IgG (H+L) | BA1050 | BOSTER BIOLOGICAL TECHNOLOGY, Wuhan, China. | Goat | / | WB: 1:10000 |

**Table 3**. Primers used for chromatin immunoprecipitation

| **Name** | **Primer 5′-3′** |
| --- | --- |
| Cebpb-1-F | ATCCACCCATGACCTCGGGT |
| Cebpb-1-R | ATCCACCCATGACCTCGGGT |
| Cebpb-2-F | TTCAACTCTCACCTGACCCA |
| Cebpb-2-R | AGTGCCATTTTCTGGCCATT |
| Cebpb-3-F | TACACATCAGTTCCTCCCTA |
| Cebpb-3-R | AGAGCTTGGGGTGGAGACTG |
| Cebpb-4-F | ACAAGTATGGGACACTTTTA |
| Cebpb-4-R | GTGTCCTCTGCAGCACGTCG |
| Cebpb-5-F | TTCTTGCCTAAGTGCTGCTG |
| Cebpb-5-R | TACCTGCCTCGAGCCATCCC |
| Cebpb-6-F | AGTCCAGTGCTCCTGTCTCT |
| Cebpb-6-R | ACGGGGCTGGCGGAGGCATT |
| Cebpb-7-F | CGTGGAGTCCCCAACCCTAT |
| Cebpb-7-R | GTTCCAACCCCTGAGGATCA |
| Cebpb-8-F | AGGTGTGGTTGCTCACACTT |
| Cebpb-8-R | TGTCATGTTGCCCAGGCTTG |
| Cebpb-9-F | ACTGCTTTCTGCAGCAGAAT |
| Cebpb-9-R | ACCCAGAGGCTGCCTCTGGC |
| Cebpb-10-F | AGATGGCTCACACTGCTCAC |
| Cebpb-10-R | CCACTACCACCAAGACACAG |
| IGFL2-AS1-P1-R | CTGCCACCACACTCAGGTAT |
| IGFL2-AS1-P2-F | ATCGGAGACTCATGCCTGTA |
| IGFL2-AS1-P2-R | AGTAGAGACAGGGTTTCACT |
| IGFL2-AS1-P3-F | CACTGAGGGAGAGGACTGGG |
| IGFL2-AS1-P3-R | AAGTTCTTGTTGCAGGTAGC |
| IGFL2-AS1-P4-F | CAACTCTCTGGTGTCAGGCC |
| IGFL2-AS1-P4-R | GGAGCAAATCACAATGATGG |
| IGFL2-AS1-P5-F | ATTGTGATTTGCTCCTGCCC |
| IGFL2-AS1-P5-R | AAGGTGGTTATCTCTTGTGG |
| HSPA1A-P1-F | TTCCAGCTACTCGGATGGCT |
| HSPA1A-P1-R | CTGCCTCAGCCTTCCGAGTA |
| HSPA1A-P2-F | CAGAGCTTGCAGTGAGCCAA |
| HSPA1A-P2-R | ATAGACACTAAACCCTTTAT |
| HSPA1A-P3-F | TGAAGCGCAGGCGGTCAGCA |
| HSPA1A-P3-R | TGCTCAGAACTCTCCAGAGT |

**Table 4.** Database of tissue microarray (HLugA180Su11, *n* = 90)

| **Tissue Number** | **Date of Surgery** | **Follow-up Time（2021.12）** | **Survival Status** | **Survival Duration** | **Gender** | **Age** | **H-score =Σ(Staining Intensity×%Positive Cells)** | | | |
| --- | --- | --- | --- | --- | --- | --- | --- | --- | --- | --- |
| **Tissue Type** | **IGFL2-AS1** | **YBX1** | **HSPA1A** |
| A01/A02 | 2013/12/2 | 2019/6/3 | Death | 66 | Woman | 58 | Cancer | 0.00 | 0.90 | 0.00 |
| Paracancer | 0.00 | 0.00 | 0.00 |
| A03/A04 | 2013/12/12 | 2015/12/23 | Death | 24 | Man | 62 | Cancer | 1.60 | 1.425 | 1.25 |
| Paracancer | 0.10 | 0.20 | 0.90 |
| A05/A06 | 2013/12/19 | 2021/12/1 | Alive | 95 | Man | 49 | Cancer | 0.40 | 1.425 | 0.25 |
| Paracancer | 0.10 | 0.90 | 0.90 |
| A07/A08 | 2013/12/25 | 2014/3/10 | Death | 2 | Woman | 64 | Cancer | 1.35 | 1.90 | 3.10 |
| Paracancer | 0.20 | 0.20 | 0.90 |
| A09/A10 | 2013/12/30 | 2021/12/1 | Alive | 95 | Woman | 61 | Cancer | 0.98 | 1.43 | 2.28 |
| Paracancer | 0.00 | 0.10 | 0.60 |
| A11/A12 | 2013/12/31 | 2018/5/7 | Death | 52 | Woman | 63 | Cancer | 0.00 | 0.65 | 1.40 |
| Paracancer | 0.00 | 0.10 | 0.10 |
| A13/A14 | 2014/1/2 | 2021/12/1 | Alive | 94 | Man | 67 | Cancer | 1.28 | 1.35 | 1.63 |
| Paracancer | 0.00 | 0.03 | 0.05 |
| A15/A16 | 2014/1/2 | 2021/12/1 | Alive | 94 | Woman | 62 | Cancer | 0.85 | 1.35 | 1.95 |
| Paracancer | 0.00 | 0.00 | 0.20 |
| A17/A18 | 2014/1/2 | 2021/1/6 | Death | 84 | Woman | 62 | Cancer | 0.10 | 1.35 | 2.75 |
| Paracancer | 0.00 | 0.05 | 0.20 |
| B01/B02 | 2014/1/3 | 2016/1/15 | Death | 24 | Man | 72 | Cancer | 0.80 | 1.90 | 2.03 |
| Paracancer | 0.10 | 0.00 | 0.10 |
| B03/B04 | 2014/5/20 | 2021/12/1 | Alive | 90 | Woman | 53 | Cancer | 0.85 | 1.43 | 1.73 |
| Paracancer | 0.20 | 0.00 | 0.15 |
| B05/B06 | 2014/6/2 | 2015/8/13 | Death | 14 | Man | 71 | Cancer | 0.40 | 1.05 | 0.00 |
| Paracancer | 0.90 | 0.10 | 0.00 |
| B07/B08 | 2014/6/3 | 2021/12/1 | Alive | 89 | Woman | 48 | Cancer | 0.30 | 0.68 | 2.25 |
| Paracancer | 0.60 | 0.00 | 0.10 |
| B09/B10 | 2014/6/3 | 2021/12/1 | Alive | 89 | Man | 59 | Cancer | 0.80 | 1.20 | 1.50 |
| Paracancer | 0.40 | 0.00 | 0.20 |
| B11/B12 | 2014/6/4 | 2021/12/1 | Alive | 89 | Man | 67 | Cancer | 0.55 | 1.20 | 1.85 |
| Paracancer |  | 0.00 | 0.15 |
| B13/B14 | 2014/6/5 | 2016/9/22 | Death | 27 | Man | 71 | Cancer | 1.28 | 1.80 | 1.70 |
| Paracancer | 0.10 | 0.00 | 0.45 |
| B15/B16 | 2014/6/5 | 2015/12/7 | Death | 18 | Man | 58 | Cancer | 0.05 | 1.80 | 0.00 |
| Paracancer | 0.10 | 0.10 | 0.00 |
| B17/B18 | 2014/6/5 | 2016/8/15 | Death | 26 | Woman | 44 | Cancer | 0.00 | 1.43 | 2.60 |
| Paracancer | 0.00 | 0.00 | 0.30 |
| C01/C02 | 2014/6/5 | 2017/8/2 | Death | 37 | Woman | 68 | Cancer | 0.00 | 1.90 | 1.10 |
| Paracancer | 0.00 | 0.00 | 0.10 |
| C03/C04 | 2014/6/6 | 2020/4/16 | Death | 70 | Woman | 66 | Cancer | 0.20 | 1.35 | 2.05 |
| Paracancer | 0.40 | 0.00 | 0.05 |
| C05/C06 | 2014/6/12 | 2018/6/18 | Death | 48 | Man | 50 | Cancer | 1.80 | 1.35 | 0.25 |
| Paracancer | 0.30 | 0.08 | 0.00 |
| C07/C08 | 2014/6/17 | 2018/10/19 | Death | 52 | Woman | 66 | Cancer | 1.35 | 0.00 | 2.93 |
| Paracancer | 0.40 | 0.00 | 0.45 |
| C09/C10 | 2014/6/23 | 2019/7/7 | Death | 60 | Woman | 48 | Cancer | 1.43 | 1.35 | 3.10 |
| Paracancer | 0.30 | 0.05 | 0.30 |
| C11/C12 | 2014/6/23 | 2016/12/20 | Death | 29 | Man | 60 | Cancer | 1.90 | 1.425 | 3.80 |
| Paracancer | 0.90 | 0.00 | 0.30 |
| C13/C14 | 2014/11/4 | 2021/12/1 | Alive | 84 | Woman | 62 | Cancer | 1.80 | 0.83 | 0.00 |
| Paracancer | 0.10 | 0.00 | 0.00 |
| C15/C16 | 2014/11/4 | 2021/12/1 | Alive | 84 | Man | 46 | Cancer | 0.85 | 1.35 | 2.30 |
| Paracancer | 0.30 | 0.20 | 1.20 |
| C17/C18 | 2014/11/10 | 2016/11/28 | Death | 24 | Man | 69 | Cancer | 0.75 | 2.85 | 2.35 |
| Paracancer | 0.50 | 0.05 | 0.15 |
| D01/D02 | 2014/11/10 | 2016/2/4 | Death | 14 | Man | 67 | Cancer | 1.80 | 1.80 | 1.48 |
| Paracancer | 0.20 | 0.00 | 0.05 |
| D03/D04 | 2014/11/10 | 2016/9/17 | Death | 22 | Woman | 54 | Cancer | 0.60 | 1.90 | 1.63 |
| Paracancer | 0.60 | 0.30 | 1.60 |
| D05/D06 | 2014/11/11 | 2016/12/7 | Death | 24 | Man | 72 | Cancer | 1.28 | 2.85 | 2.00 |
| Paracancer | 0.20 | 0.45 | 0.80 |
| D07/D08 | 2014/11/18 | 2020/3/12 | Death | 63 | Woman | 65 | Cancer | 1.90 | 1.43 | 3.00 |
| Paracancer | 0.90 | 0.00 | 0.30 |
| D09/D10 | 2014/11/18 | 2017/2/4 | Death | 26 | Man | 74 | Cancer | 1.60 | 0.00 | 0.75 |
| Paracancer | 0.90 | 0.00 | 0.10 |
| D11/D12 | 2014/11/18 | 2021/12/1 | Alive | 84 | Man | 70 | Cancer | 1.90 | 1.35 | 2.10 |
| Paracancer | 1.35 | 0.00 | 1.20 |
| D13/D14 | 2014/11/24 | 2021/12/1 | Alive | 84 | Man | 47 | Cancer | 1.28 | 1.20 | 1.95 |
| Paracancer | 0.23 | 0.00 | 0.15 |
| D15/D16 | 2014/11/24 | 2021/12/1 | Alive | 84 | Man | 61 | Cancer | 1.70 | 0.15 | 0.00 |
| Paracancer | 0.00 | 0.00 | 0.00 |
| D17/D18 | 2014/11/25 | 2019/3/27 | Death | 52 | Woman | 66 | Cancer | 1.35 | 1.30 | 3.15 |
| Paracancer | 0.10 | 0.00 | 0.15 |
| E01/E02 | 2014/11/26 | 2017/1/10 | Death | 25 | Man | 62 | Cancer | 1.43 | 1.90 | 1.25 |
| Paracancer | 0.40 | 0.05 | 0.10 |
| E03/E04 | 2014/11/27 | 2021/12/1 | Alive | 84 | Man | 37 | Cancer | 1.28 | 0.10 | 0.30 |
| Paracancer | 0.30 | 0.00 | 0.30 |
| E05/E06 | 2014/12/1 | 2017/12/23 | Death | 36 | Woman | 66 | Cancer | 1.80 | 1.90 | 2.10 |
| Paracancer | 0.60 | 0.00 | 1.80 |
| E07/E08 | 2014/12/2 | 2017/12/11 | Death | 36 | Man | 44 | Cancer | 0.30 | 0 | 0.00 |
| Paracancer | 0.90 | 0 | 1.60 |
| E09/E10 | 2014/12/2 | 2017/1/12 | Death | 25 | Woman | 42 | Cancer | 1.43 | 1.90 | 1.95 |
| Paracancer | 0.20 | 0.90 | 1.60 |
| E11/E12 | 2014/12/4 | 2015/7/27 | Death | 7 | Man | 57 | Cancer | 0.80 | 1.90 | 2.30 |
| Paracancer | 0.05 | 0.00 | 0.15 |
| E13/E14 | 2014/12/5 | 2021/12/1 | Alive | 83 | Man | 67 | Cancer | 0.05 | 1.20 | 2.00 |
| Paracancer | 0.40 | 0.00 | 0.20 |
| E15/E16 | 2014/12/8 | 2021/12/1 | Alive | 83 | Woman | 72 | Cancer | 0.90 | 0.30 | 1.35 |
| Paracancer | 0.00 | 0.10 | 0.60 |
| E17/E18 | 2014/12/9 | 2016/7/22 | Death | 19 | Man | 49 | Cancer | 0.30 | 1.90 | 2.70 |
| Paracancer | 0.10 | 0.20 | 0.20 |
| F01/F02 | 2014/12/10 | 2017/7/13 | Death | 31 | Woman | 67 | Cancer | 0.00 | 1.90 | 2.80 |
| Paracancer | 0.00 | 0.20 | 0.30 |
| F03/F04 | 2014/12/11 | 2017/12/29 | Death | 36 | Woman | 46 | Cancer | 1.28 | 1.80 | 1.03 |
| Paracancer | 0.15 | 0.00 | 0.15 |
| F05/F06 | 2014/12/11 | 2018/6/4 | Death | 41 | Man | 53 | Cancer | 0.90 | 1.90 | 2.00 |
| Paracancer | 0.40 | 0.60 | 0.20 |
| F07/F08 | 2014/12/11 | 2021/12/1 | Alive | 83 | Man | 47 | Cancer | 0.40 | 1.90 | 2.25 |
| Paracancer | 0.30 | 0.05 | 1.60 |
| F09/F10 | 2014/12/15 | 2021/12/1 | Alive | 83 | Man | 65 | Cancer | 0.80 | 1.90 | 0.06 |
| Paracancer | 1.05 | 0.00 | 0.05 |
| F11/F12 | 2014/12/16 | 2021/12/1 | Alive | 83 | Woman | 57 | Cancer | 1.35 | 1.43 | 0.00 |
| Paracancer | 0.45 | 0.00 | 0.00 |
| F13/F14 | 2014/12/17 | 2015/5/25 | Death | 5 | Man | 65 | Cancer | 1.35 | 0.70 | 0.00 |
| Paracancer | 0.30 | 0.05 | 0.00 |
| F15/F16 | 2014/12/22 | 2015/8/18 | Death | 7 | Man | 70 | Cancer | 1.43 | 1.80 | 0.00 |
| Paracancer | 0.00 | 0.10 | 0.00 |
| F17/F18 | 2014/12/23 | 2017/6/30 | Death | 30 | Man | 75 | Cancer | 0.20 | 0.20 | 2.00 |
| Paracancer | 0.40 | 0.20 | 0.90 |
| G01/G02 | 2014/12/23 | 2017/1/28 | Death | 25 | Man | 68 | Cancer | 1.43 | 2.00 | 1.95 |
| Paracancer | 0.60 | 0.05 | 0.20 |
| G03/G04 | 2014/12/23 | 2016/9/15 | Death | 20 | Man | 49 | Cancer | 0.90 | 1.90 | 2.25 |
| Paracancer | 0.00 | 0.00 | 0.00 |
| G05/G06 | 2014/12/25 | 2017/2/7 | Death | 25 | Man | 58 | Cancer | 0.90 | 1.90 | 2.20 |
| Paracancer | 0.10 | 0.10 | 0.60 |
| G07/G08 | 2014/12/26 | 2017/7/10 | Death | 30 | Man | 48 | Cancer | 0.10 | 0.80 | 0.00 |
| Paracancer | 0.30 | 0.10 | 0.10 |
| G09/G10 | 2014/12/29 | 2021/12/1 | Alive | 83 | Woman | 51 | Cancer | 0.90 | 1.90 | 1.65 |
| Paracancer | 0.40 | 0.00 | 0.00 |
| G11/G12 | 2014/12/29 | 2021/12/1 | Alive | 83 | Woman | 71 | Cancer | 0.00 | 0.00 | 0.00 |
| Paracancer | 0.00 | 0.00 | 0.00 |
| G13/G14 | 2015/1/7 | 2016/7/17 | Death | 18 | Man | 51 | Cancer | 0.90 | 1.425 | 2.60 |
| Paracancer | 0.10 | 0.45 | 1.20 |
| G15/G16 | 2015/1/9 | 2019/4/23 | Death | 51 | Woman | 51 | Cancer | 1.28 | 0.90 | 0.16 |
| Paracancer | 0.10 | 0.00 | 0.90 |
| G17/G18 | 2015/1/9 | 2016/7/1 | Death | 17 | Woman | 58 | Cancer | 0.00 | 1.35 | 1.70 |
| Paracancer | 0.00 | 0.05 | 0.10 |
| H01/H02 | 2015/1/9 | 2020/7/9 | Death | 66 | Man | 67 | Cancer | 0.00 | 0.40 | 1.50 |
| Paracancer | 0.00 | 0.10 | 0.50 |
| H03/H04 | 2015/1/10 | 2019/4/10 | Death | 51 | Woman | 60 | Cancer | 0.00 | 1.43 | 1.38 |
| Paracancer | 0.00 | 0.30 | 0.60 |
| H05/H06 | 2015/1/13 | 2020/11/4 | Death | 69 | Woman | 68 | Cancer | 1.90 | 1.90 | 2.00 |
| Paracancer | 0.30 | 0.10 | 0.10 |
| H07/H08 | 2015/1/13 | 2021/12/1 | Alive | 82 | Man | 50 | Cancer | 1.43 | 1.05 | 1.45 |
| Paracancer | 0.20 | 0.05 | 0.10 |
| H09/H10 | 2015/1/14 | 2021/12/1 | Alive | 82 | Woman | 53 | Cancer | 1.35 | 0.90 | 1.58 |
| Paracancer | 0.00 | 0.00 | 0.00 |
| H11/H12 | 2015/1/19 | 2021/12/1 | Alive | 82 | Man | 62 | Cancer | 0.98 | 1.80 | 0.26 |
| Paracancer | 0.60 | 0.90 | 0.30 |
| H13/H14 | 2015/1/19 | 2021/12/1 | Alive | 82 | Man | 59 | Cancer | 1.28 | 1.20 | 2.05 |
| Paracancer | 0.10 | 0.20 | 0.30 |
| H15/H16 | 2015/1/22 | 2016/3/9 | Death | 13 | Woman | 64 | Cancer | 1.80 | 1.35 | 2.70 |
| Paracancer | 0.20 | 0.00 | 0.05 |
| H17/H18 | 2015/2/9 | 2019/4/9 | Death | 50 | Man | 60 | Cancer | 0.00 | 1.35 | 2.80 |
| Paracancer | 0.00 | 0.20 | 0.90 |
| I01/I02 | 2015/2/10 | 2018/7/18 | Death | 41 | Man | 53 | Cancer | 1.35 | 1.80 | 1.95 |
| Paracancer | 0.60 | 0.00 | 0.08 |
| I03/I04 | 2015/3/3 | 2017/1/24 | Death | 22 | Woman | 68 | Cancer | 1.35 | 1.90 | 1.80 |
| Paracancer | 0.60 | 0.20 | 1.20 |
| I05/I06 | 2015/3/5 | 2017/4/6 | Death | 25 | Woman | 40 | Cancer | 0.45 | 1.90 | 1.85 |
| Paracancer | 0.15 | 0.00 | 0.45 |
| I07/I08 | 2015/3/7 | 2017/7/31 | Death | 28 | Woman | 56 | Cancer | 0.83 | 1.30 | 1.80 |
| Paracancer | 0.60 | 0.00 | 0.90 |
| I09/I10 | 2015/3/18 | 2021/12/1 | Alive | 80 | Man | 59 | Cancer | 0.75 | 0.00 | 1.93 |
| Paracancer | 0.20 | 0.00 | 0.90 |
| I11/I12 | 2015/3/23 | 2021/12/1 | Alive | 80 | Woman | 60 | Cancer | 1.28 | 1.425 | 2.10 |
| Paracancer | 0.30 | 0.10 | 1.35 |
| I13/I14 | 2015/3/23 | 2016/8/31 | Death | 17 | Man | 79 | Cancer | 1.35 | 0.90 | 2.40 |
| Paracancer | 0.30 | 0.00 | 0.30 |
| I15/I16 | 2015/3/25 | 2021/12/1 | Alive | 80 | Woman | 72 | Cancer | 1.28 | 1.43 | 1.30 |
| Paracancer | 0.00 | 0.00 | 0.05 |
| I17/I18 | 2015/3/31 | 2019/12/6 | Death | 56 | Man | 61 | Cancer | 0.20 | 0.80 | 0.55 |
| Paracancer | 0.00 | 0.10 | 1.20 |
| J01/J02 | 2015/4/3 | 2016/9/16 | Death | 17 | Man | 70 | Cancer | 1.50 | 1.90 | 2.00 |
| Paracancer | 1.20 | 0.00 | 0.45 |
| J03/J04 | 2015/4/3 | 2020/9/17 | Death | 65 | Woman | 57 | Cancer | 1.43 | 1.90 | 1.63 |
| Paracancer | 0.45 | 0.10 | 0.20 |
| J05/J06 | 2015/4/13 | 2021/12/1 | Alive | 79 | Woman | 59 | Cancer | 1.43 | 1.90 | 2.23 |
| Paracancer | 0.20 | 0.00 | 0.45 |
| J07/J08 | 2015/4/13 | 2021/12/1 | Alive | 79 | Man | 50 | Cancer | 0.68 | 0.53 | 1.53 |
| Paracancer | 0.23 | 0.90 | 0.90 |
| J09/J10 | 2015/6/16 | 2021/12/1 | Alive | 77 | Woman | 50 | Cancer | 1.43 | 1.80 | 0.00 |
| Paracancer | 0.30 | 0.10 | 0.00 |
| J11/J12 | 2015/6/16 | 2019/7/16 | Death | 49 | Woman | 69 | Cancer | 1.28 | 0.00 | 2.05 |
| Paracancer | 0.10 | 0.00 | 1.60 |
| J13/J14 | 2015/7/6 | 2019/11/27 | Death | 52 | Woman | 60 | Cancer | 0.35 | 1.20 | 2.00 |
| Paracancer | 0.00 | 0.00 | 1.35 |
| J15/J16 | 2015/7/6 | 2016/6/14 | Death | 11 | Woman | 65 | Cancer | 0.00 | 1.425 | 2.80 |
| Paracancer | 0.00 | 0.00 | 0.45 |
| J17/J18 | 2015/7/20 | 2021/12/1 | Alive | 76 | Man | 52 | Cancer | 0.70 | 1.43 | 1.63 |
| Paracancer | 0.00 | 0.90 | 1.80 |

This tissue microarray comprised 90 pairs of lung adenocarcinoma tissues and matched adjacent normal tissues. All enrolled patients had not received preoperative radiotherapy, chemotherapy, or any adjuvant antitumor therapies. Pathological confirmation of lung adenocarcinoma was established through hematoxylin-eosin staining, with complete clinicopathological record,s including sex, age, and survival outcomes. The patient population, aged 37–79 years, underwent surgical resection between December 2013 and July 2015, with follow-up data collected through December 2021. Tissue microarray analysis revealed that IGFL2-AS1 expression levels were determined by in situ hybridization, while protein expressions of YBX1 and HSPA1A were quantitatively assessed using immunohistochemical staining.
