# Supplementary material for: lncRNA IGFL2-AS1 mediates NSCLC chemoresistance via YBX1-induced HSPA1A/RAP1 activation
Source: Springer Nature journal article supplement (doi:10.1186/s11658-025-00808-5), 2025-11-07
Supplement: MOESM2 [file 11658_2025_808_MOESM2_ESM.docx]

**Additional File 2 (Figures): Supporting information for**

**LncRNA IGFL2-AS1 mediates NSCLC chemoresistance via YBX1-induced HSPA1A/RAP1 activation**

Hongliang Dong1,2,3†, Yunxiu Xia2,4†, Jingjing Qi5†, Cuilan Liu1,2,3, Fei Wang1,2,3, Bingjie Cui1,2,3, Weiwei Chen1,2,3, Wenwen Lv6, Nailiang Zhai1, Jiong Deng1,2, Yong Yu5, Fangling Ning3, Clemens A. Schmitt5,7,8,9*, Jing Du1,2,3*

1Department of Respiratory and Critical Care Medicine, Binzhou Medical University Hospital, 256600 Binzhou, P.R. China

2Medical Research Center, Binzhou Medical University Hospital, 256600 Binzhou, P.R. China

3Department of Oncology, Binzhou Medical University Hospital, 256600 Binzhou, P.R. China

4Department of Gynecology, Binzhou Medical University Hospital, 256600 Binzhou, P.R. China

5Faculty of Medicine, Johannes Kepler University Linz, Altenberger Strasse 69, 4040 Linz, Austria

6Department of Pharmacy, Binzhou Medical University Hospital, 256600 Binzhou, P.R. China

7Johannes Kepler University, Altenbergerstraße 69, 4040 Linz, Austria

8Charité - Universitätsmedizin Berlin, corporate member of Freie Universität Berlin, Humboldt-Universität zu Berlin, and Berlin Institute of Health, Medical Department of Hematology, Oncology and Tumor Immunology, and Molekulares Krebsforschungszentrum - MKFZ, Campus Virchow Klinikum, 13353 Berlin, Germany

9Max-Delbrück-Center for Molecular Medicine in the Helmholtz Association, Robert-Rössle-Straße 1013125 Berlin, Germany

†Hongliang Dong, Yunxiu Xia, and Jingjing Qi contributed equally to this work.

***Correspondence**

Jing Du, Binzhou Medical University Hospital, 661 Huanghe Second Road, Binzhou, P.R. China

Email: djedith@bzmc.edu.cn

Clemens A. Schmitt, Department of Hematology and Internal Oncology, Kepler University Hospital, Krankenhausstraße 9, 4020 Linz, Austria

Email: [clemens.schmitt@charite.de](mailto:clemens.schmitt@charite.de)

**Fig. S1. LncRNA and mRNA high-throughput screening with DDP-resistant A549 cells.**

**A** Resistance index of resistant cells (A549/DDP) and parental A549 cells to cisplatin (DDP), as measured using CCK8 and IC50 calculation. **B** KEGG analysis of pathways upregulated in both DDP primary resistant cells (PR) and DDP secondary resistant cells (SR) compared to parental A549 cells (PC). **C** Potential peptide coding of *IGFL2-AS1*, as predicted using the Lncipedia database. All plots are presented as the mean ± SD. Statistical analyses: two-way ANOVA with Dunnett’s multiple comparison test (A). **P* < 0.05, ***P* < 0.01, ****P* < 0.001.

**Fig. S2. IGFL2-AS1 prohibits the invasiveness and stemness of lung cancer cells and associated markers.**

**A** Wound healing assay and quantification of A549 (left) and H520 (right) 48 h after *IGFL2-AS1* overexpression. Scale bar, 50 μm. **B** Transcription levels of EMT-related genes (*Snail*, *Twist*, *Vimentin*, and *E-cadherin*) in lung cancer cells following *IGFL2-AS1* overexpression, as detected using qRT-PCR**. C** Transcription level of stemness-related genes (*ABCG2*, *OCT4*, and *NANOG*) in lung cancer cells following IGFL2-AS1 overexpression, as detected using qRT-PCR. **D** Wound healing assay and quantification of A549 (upper) and H520 (lower) expression 48 h following *IGFL2-AS1* knockdown. Scale bar, 50 μm. **E** Transcription levels of EMT-related genes (*Snail*, *Twist*, *Vimentin*, *and E-cadherin*) in lung cancer cells following *IGFL2-AS1* knockdown, as detected using qRT-PCR. All plots are presented as the mean ± SD. Statistical analyses: two-tailed unpaired Student’s *t-*test (A, B and C), one-way ANOVA with Dunnett’s multiple comparison test (D, E). **P* < 0.05, ***P* < 0.01, ****P*< 0.001

**Fig. S3. IGFL2-AS1 inhibition sensitizes A549 cells to chemotherapy *in vivo*.**

**A** Luminescent signal of subcutaneously implanted luciferase-tagged A459 cells following IGFL2-AS1 inhibition or in combination with chemotherapy (n = 6 mice per group). **B** IHC staining of Ki67, Vimentin, and SOX2 across different groups. Scale bar, 50 μm. **C** Changes in the body weight of mice in various groups (n = 6 mice per group).

**Fig. S4. IGFL2-AS1 promotes invasion via HSPA1A.**

**A** KEGG analysis of the signaling cascade stimulated in both A549 and H520 IGFL2-AS1 overexpressing cells compared to corresponding control cells infected with the empty vector backbone. **B** Venn diagram displaying genes upregulated in both A549 and H520 cells following *IGFL2-AS1* overexpression. **C** Immunoblot assay for the validation of genetic manipulation of *HSPA1A* in H520 cells. **D** Transcription levels of EMT-related markers (*E-cadherin*, *Twist*, and *Snail*) following *HSPA1A* knockdown in H520 cells, as detected using qRT-PCR. **E** Transcription levels of EMT-related markers (*E-cadherin*, *Twist,* and *Snail*) following HSPA1A overexpression in H520 cells, as detected using qRT-PCR. **F** Wound healing assay and histogram quantification of lung cancer cells following *IGFL2-AS1* overexpression alone or together with *HSPA1A* downregulation. **G** Wound healing assay and histogram quantification of lung cancer cells following *IGFL2-AS1* knockdown either alone or together with *HSPA1A* overexpression. All plots are depicted as the mean ± SD. Statistical analyses: two-tailed unpaired Student’s *t-*test (E), one-way ANOVA with Dunnett’s multiple comparison test (D, F and G). **P* < 0.05, ***P* < 0.01, ****P* < 0.001

**Fig. S5. IGFL2-AS1 and HNRNPA1 do not interact in lung cancer cells.**

**A** Interaction domain between HNRNPA1 and IGFL2-AS1, as predicted by the catRAPID database. **B** Binding sequences between *HNRNPA1* and *HSPA1A* mRNA, as predicted by the catRAPID database. **C** Negative interaction between HNRNPA1 and IGFL2-AS1 in A549 cells, as demonstrated by an RNA pulldown assay followed by immunoblotting. **D** Negative interaction between HNRNPA1 and IGFL2-AS1 in A549 cells, as demonstrated by RIP followed by qRT-PCR. **E** Negative effect of *IGFL2-AS1* knockdown on *HNRNPA1* transcription, as detected using qRT-PCR. **F** Negative effect of *IGFL2-AS1* knockdown on HNRNPA1 protein level, as detected using immunoblot. All plots are depicted as the mean ± SD. Statistical analyses: two-tailed unpaired Student’s *t-*test (D), one-way ANOVA with Dunnett’s multiple comparison test (E). **P* < 0.05, ***P* < 0.01, ****P* < 0.001

**Fig. S6. YBX1 positively modulates the expression of** **IGFL2-AS1 and HSPA1A.**

**A** RNA pulldown precipitate by the *IGFL2-AS1* sense strand compared to the antisense strand in lung cancer cells. **B** Interaction domain between YBX1 and IGFL2-AS1 predicted by the catRAPID database. **C** Transcription levels of IGFL2-AS1 and HSPA1A in lung cancer cells following *YBX1* overexpression, as detected using qRT-PCR. **D** Transcription levels of *IGFL2-AS1* and *HSPA1A* in lung cancer cells following *YBX1* knockdown, as detected using qRT-PCR. **E** Regulatory effect of YBX1 on HSPA1A protein level in lung cancer cells, as detected using immunoblot. **F** Negative effect of IGFL2-AS1 knockdown on *YBX1* mRNA expression, as detected using qRT-PCR. **G** Negative effect of *IGFL2-AS1* knockdown on YBX1 protein level, as detected using immunoblotting. All plots are presented as the mean ± SD. Statistical analyses: two-tailed unpaired Student’s *t-*test (C) and one-way ANOVA with Dunnett’s multiple comparison test (D, F). **P* < 0.05, ***P* < 0.01, ****P* < 0.001

**Fig. S7. Signaling cascades affected by *HSPA1A* upregulation in lung cancer cells.**

**A** Heatmap of oncogenic pathways (Rap1, AMPK, Hippo, Hedgehog, cAMP and mTOR) changed in response to *HSPA1A* upregulation. **B** KEGG assay of RNA sequencing demonstrating pathways downregulated upon *HSPA1A* upregulation. **C** Heatmap of anti-cancer cascades (p53 and apoptosis pathways) upon HSPA1A upregulation. **D** Gene set enrichment analysis of anti-cancer cascades (p53 and apoptosis pathways) following *HSPA1A* upregulation. **E** Flow cytometry detection of changes in apoptosis capacity in A549 and H520 cells after knockdown of *IGFL2-AS1* or *HSPA1A.* All plots are presented as the mean ± SD. Statistical analyses: one-way ANOVA with Dunnett’s multiple comparison test (E). **P* < 0.05, ***P* < 0.01, ****P* < 0.001

**Fig. S8. *In vivo* therapeutic intervention of HSPA1A sensitizes lung cancer to chemotherapies.**

**A** Images of luciferase indicated subcutaneously implanted A549 tumor bulk upon monotherapy or combinational therapy (n = 5 mice per group). **B** IHC staining of Ki67 in mice following VER155008 monotherapy or in combination with chemotherapy. Scale bar, 50 μm. **C** IHC staining of HSPA1A in mice following VER155008 monotherapy or combination with chemotherapy. Scale bar, 50 μm.

**Fig. S9. Images of luciferase indicated lung metastatic A549 tumor bulk upon distinct therapy.**

Images of luciferase indicated lung metastatic A549 tumor bulk upon monotherapy or combinational therapy (n = 3 mice per group).
